# Supplementary material
Source: ML conference proceedings conference paper supplement (https://openreview.net/forum?id=HrBgldLo9ec)
Supplement: supplementary_material [file attachment]

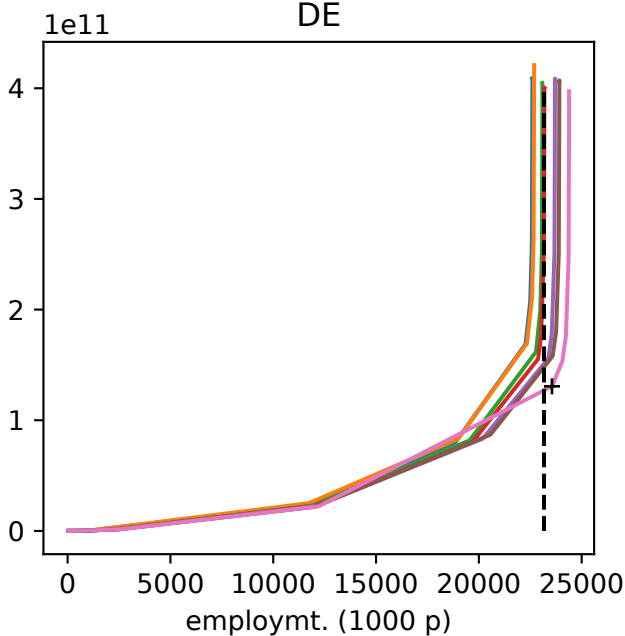

| Sector                                  | Empl. red. (1000 p) |
|-----------------------------------------|---------------------|
| Plastics, basic                         | 134.8               |
| Cement, lime and plaster                | 78.63               |
| Distribution services of gaseous fuels  | 61.46               |
| Distribution and trade services of elec | 38.03               |
| Dairy products                          | 35.39               |
| Air transport services (62)             | 32.67               |
