# Supplementary material
Source: ML conference proceedings conference paper supplement (https://openreview.net/forum?id=HrBgldLo9ec)
Supplement: supplementary_material [file attachment]

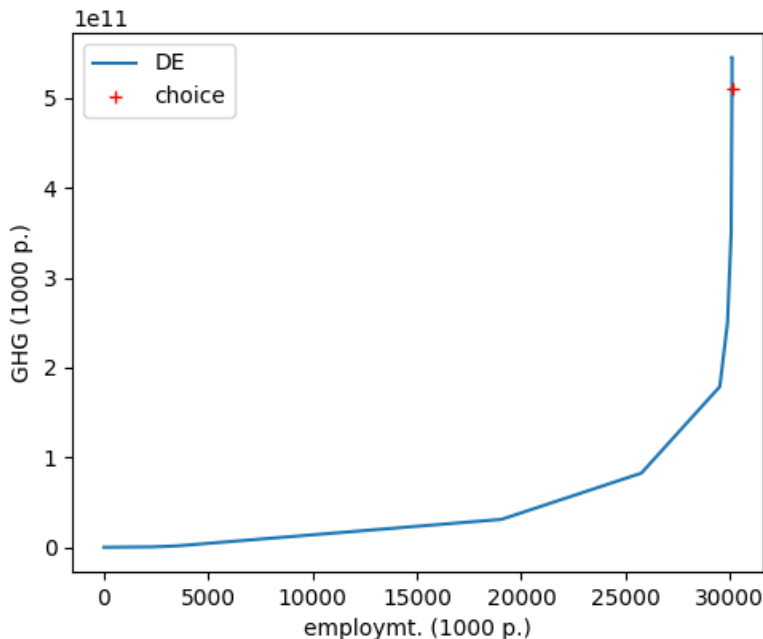

|                                        |       |
|----------------------------------------|-------|
| Food waste for treatment: landfill     | 99.99 |
| Paper for treatment: landfill          | 99.99 |
| Textiles waste for treatment: landfill | 99.99 |
| Wood waste for treatment: landfill     | 99.94 |
| Iron ores                              | 99.74 |
| Coke Oven Coke                         | 99.37 |
| Steam and hot water supply services    | 98.76 |
| Plastic waste for treatment: landfill  | 98.24 |
