# Supplementary material
Source: ML conference proceedings conference paper supplement (https://openreview.net/forum?id=HrBgldLo9ec)
Supplement: supplementary_material [file attachment]

Intervention  
controls  
 $\mathbf{u}$

Intervention  
parameters

Intervention design layer

$$\alpha = g(\mathbf{u}, \gamma)$$

Equilibrium layer

$$x^* = \alpha \cdot f(x^*, \theta)$$

Loss  
to minimize

$$\mathcal{L}(\gamma) = h(x^*) + \lambda(x^* - x_0^*)^2$$
