# Supplementary material
Source: ML conference proceedings conference paper supplement (https://openreview.net/forum?id=HrBgldLo9ec)
Supplement: supplementary_material [file attachment]

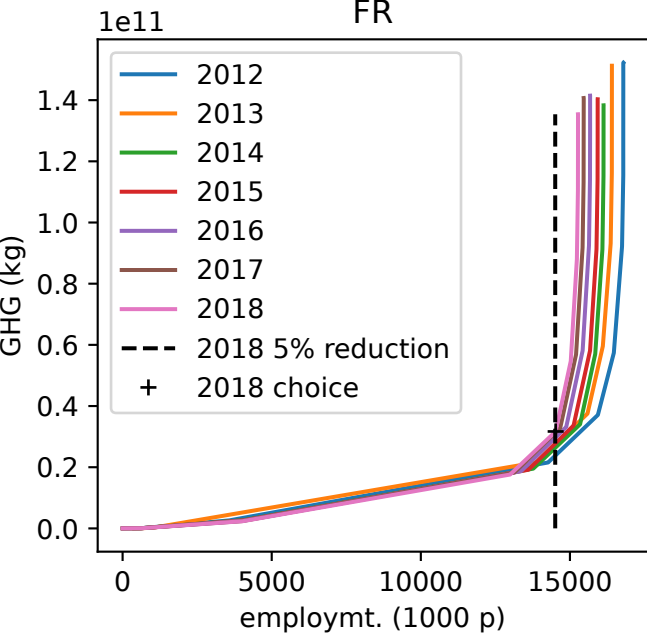

| Sector                                  | Empl. red. (1000 p) |
|-----------------------------------------|---------------------|
| Supporting and auxiliary transport serv | 153.47              |
| Railway transportation services         | 79.83               |
| Distribution services of gaseous fuels  | 56.32               |
| Plastics, basic                         | 55.32               |
| Printed matter and recorded media (22)  | 55.03               |
| Cement, lime and plaster                | 41.98               |
