# Supplementary material
Source: ML conference proceedings conference paper supplement (https://openreview.net/forum?id=HrBgldLo9ec)
Supplement: supplementary_material [file attachment]

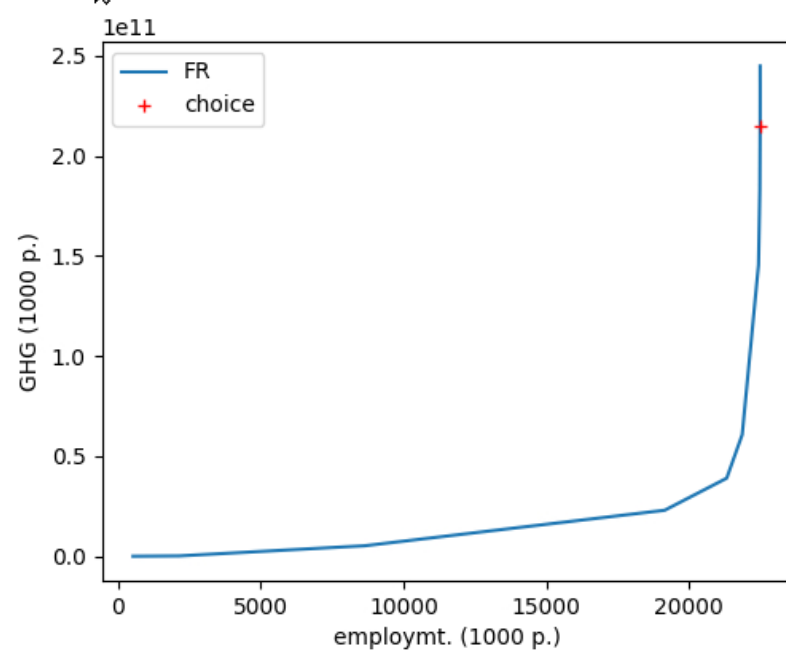

|                                          |       |
|------------------------------------------|-------|
| Natural Gas Liquids                      | 99.95 |
| Natural gas and services related to natu | 99.95 |
| Wool, silk-worm cocoons                  | 99.95 |
| Transportation services via pipelines    | 99.82 |
| Electricity by coal                      | 99.49 |
| Coal Tar                                 | 97.18 |
| Coke Oven Coke                           | 97.12 |
| Electricity by petroleum and other oil d | 79.7  |

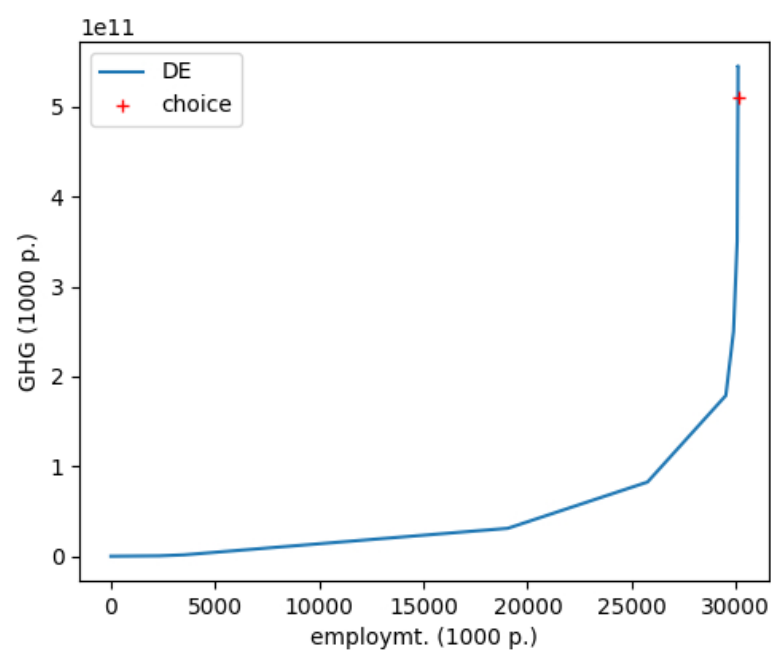

|                                        |       |
|----------------------------------------|-------|
| Food waste for treatment: landfill     | 99.99 |
| Paper for treatment: landfill          | 99.99 |
| Textiles waste for treatment: landfill | 99.99 |
| Wood waste for treatment: landfill     | 99.94 |
| Iron ores                              | 99.74 |
| Coke Oven Coke                         | 99.37 |
| Steam and hot water supply services    | 98.76 |
| Plastic waste for treatment: landfill  | 98.24 |

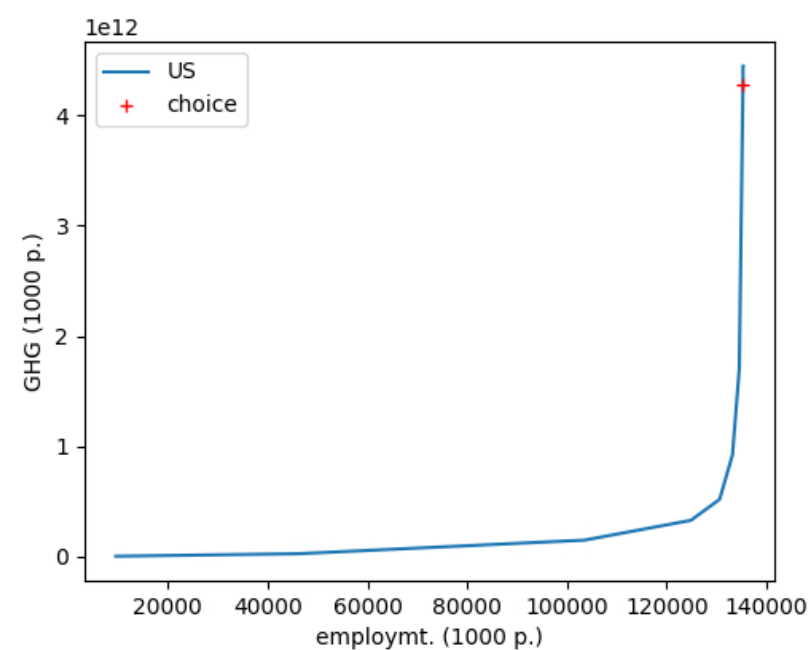

|                                          |       |
|------------------------------------------|-------|
| Steam and hot water supply services      | 99.99 |
| Meat animals nec                         | 99.99 |
| Electricity by petroleum and other oil d | 99.96 |
| Coke Oven Coke                           | 99.89 |
| Electricity by solar photovoltaic        | 98.11 |
| Paddy rice                               | 0.09  |
| Electricity by coal                      | 0.05  |
| Sugar                                    | 0.04  |
