# Supplementary material
Source: ML conference proceedings conference paper supplement (https://openreview.net/forum?id=HrBgldLo9ec)
Supplement: supplementary_material [file attachment]

*Lie intervention parameter*

$\mathbf{u}$

*Group action  
parameters*

*Intervention design  
layer*

$$\alpha = g(\mathbf{u}, \gamma)$$

*Equilibrium layer*

$$x^{(\mathbf{u})} = \alpha \cdot f(x^{(\mathbf{u})}, \theta)$$

*Loss  
to minimize*

$$\mathcal{L}(\gamma) = h(x^{(\mathbf{u})}) + \lambda D(x^{(\mathbf{u})}, x^*)$$
