# Supplementary material
Source: ML conference proceedings conference paper supplement (https://openreview.net/forum?id=HrBgldLo9ec)
Supplement: supplementary_material [file attachment]

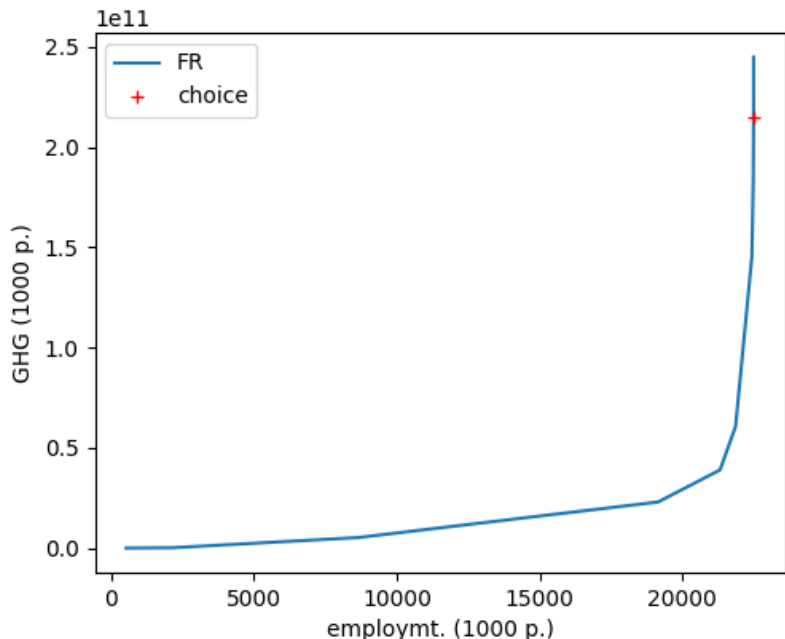

|                                          |       |
|------------------------------------------|-------|
| Natural Gas Liquids                      | 99.95 |
| Natural gas and services related to natu | 99.95 |
| Wool, silk-worm cocoons                  | 99.95 |
| Transportation services via pipelines    | 99.82 |
| Electricity by coal                      | 99.49 |
| Coal Tar                                 | 97.18 |
| Coke Oven Coke                           | 97.12 |
| Electricity by petroleum and other oil d | 79.7  |
